# Supplementary material
Source: PubMed Central journal article supplement (PMC6311450)
Supplement: NIHMS1510584-supplement-2.pdf [file NIHMS1510584-supplement-2.pdf]

## **Supplemental Information**

### **Mapping Cellular Reprogramming via Pooled Overexpression Screens with Paired Fitness and Single Cell RNA-Sequencing Readout**

*Udit Parekh, Yan Wu, Dongxin Zhao, Atharv Worlikar, Neha Shah, Kun Zhang, Prashant Mali*

**a** TF-Hygro Cloning Strategy

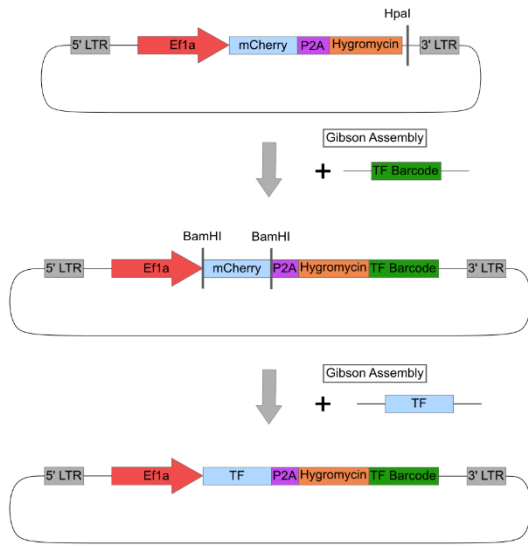

**b** Confirmation of Overexpression by qRT-PCR Analysis

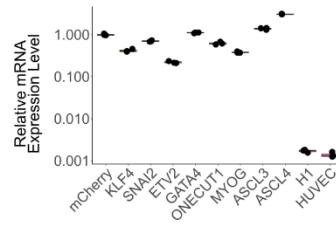

**c** TF-NoHygro Cloning Strategy

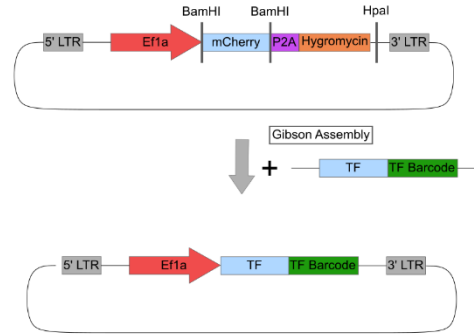

**d** Schematic of different lentiviral ORF overexpression vector design and packaging methods

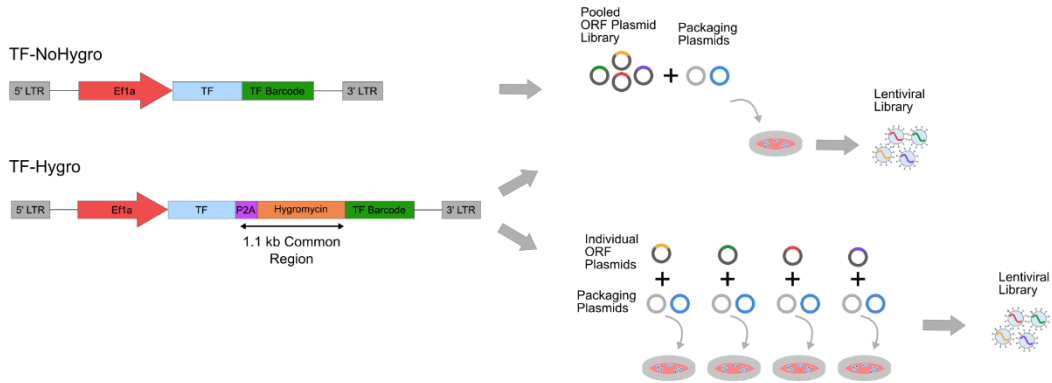

**e** Neural TF Sub-Library

- ASCL1
- ASCL3
- ASCL4
- ASCL5
- FOXA2
- LHX3
- LMX1A
- MITF
- NEUROD1
- NEUROG1
- NEUROG3
- NRL
- OTX2
- SNAI2
- mCherry

**f** Barcode Shuffling Rates

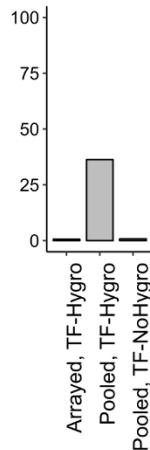

**g** Correlation of Regression Coefficients for cells with single overexpressed TF

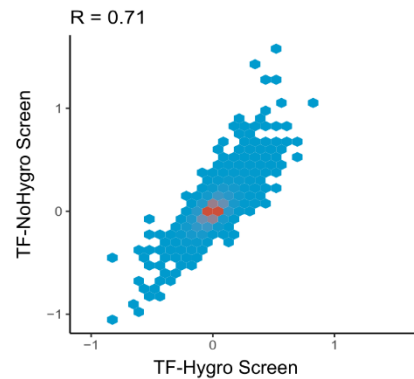

**Figure S1: Vector design, cloning and characterization, and identification of significant TFs. Related to Figure 1 and STAR Methods sections “Library Preparation”, “Quantification of Barcode Shuffling” and “Replicate Correlation”.**

(a) The construction of TF-Hygro involved two steps: (i) insertion of a pool of barcodes into the backbone after digestion with HpaI, (ii) individually substituting mCherry with TFs after digestion with BamHI. (b) Confirmation of exogenous expression of select overexpressed TFs by qRT-PCR analysis. Data for all assays were normalized to *GAPDH* and expressed relative to control mCherry-transduced cells. Untransduced H1 hESCs and HUVECs were used as negative controls. Primers were chosen such that they amplified a portion of the transcript in the hygromycin resistance region. This was done to avoid amplification of any endogenous transcripts, and since the overexpression is driven by a single promoter the TF, P2A peptide and the hygromycin resistance are on a single transcript. (c) The construction of TF-NoHygro involved a single step, individually substituting mCherry with TFs after digestion with BamHI and HpaI. Barcodes were inserted via the TF amplification primers, using which TFs were amplified out of TF-Hygro plasmids. (d) Schematic of different lentiviral ORF overexpression vector designs and pooled vs arrayed packaging methods. (e) 14-element Neural TF sub-library. (f) Quantification of shuffling rates for individually packaged virus using the TF-Hygro design, pooled virus packaging using the TF-Hygro design, and pooled virus packaging using the TF-NoHygro design. (g) Correlation between single TF regression coefficients for scRNA-seq screens on the Neural TF library using the original and updated vectors.

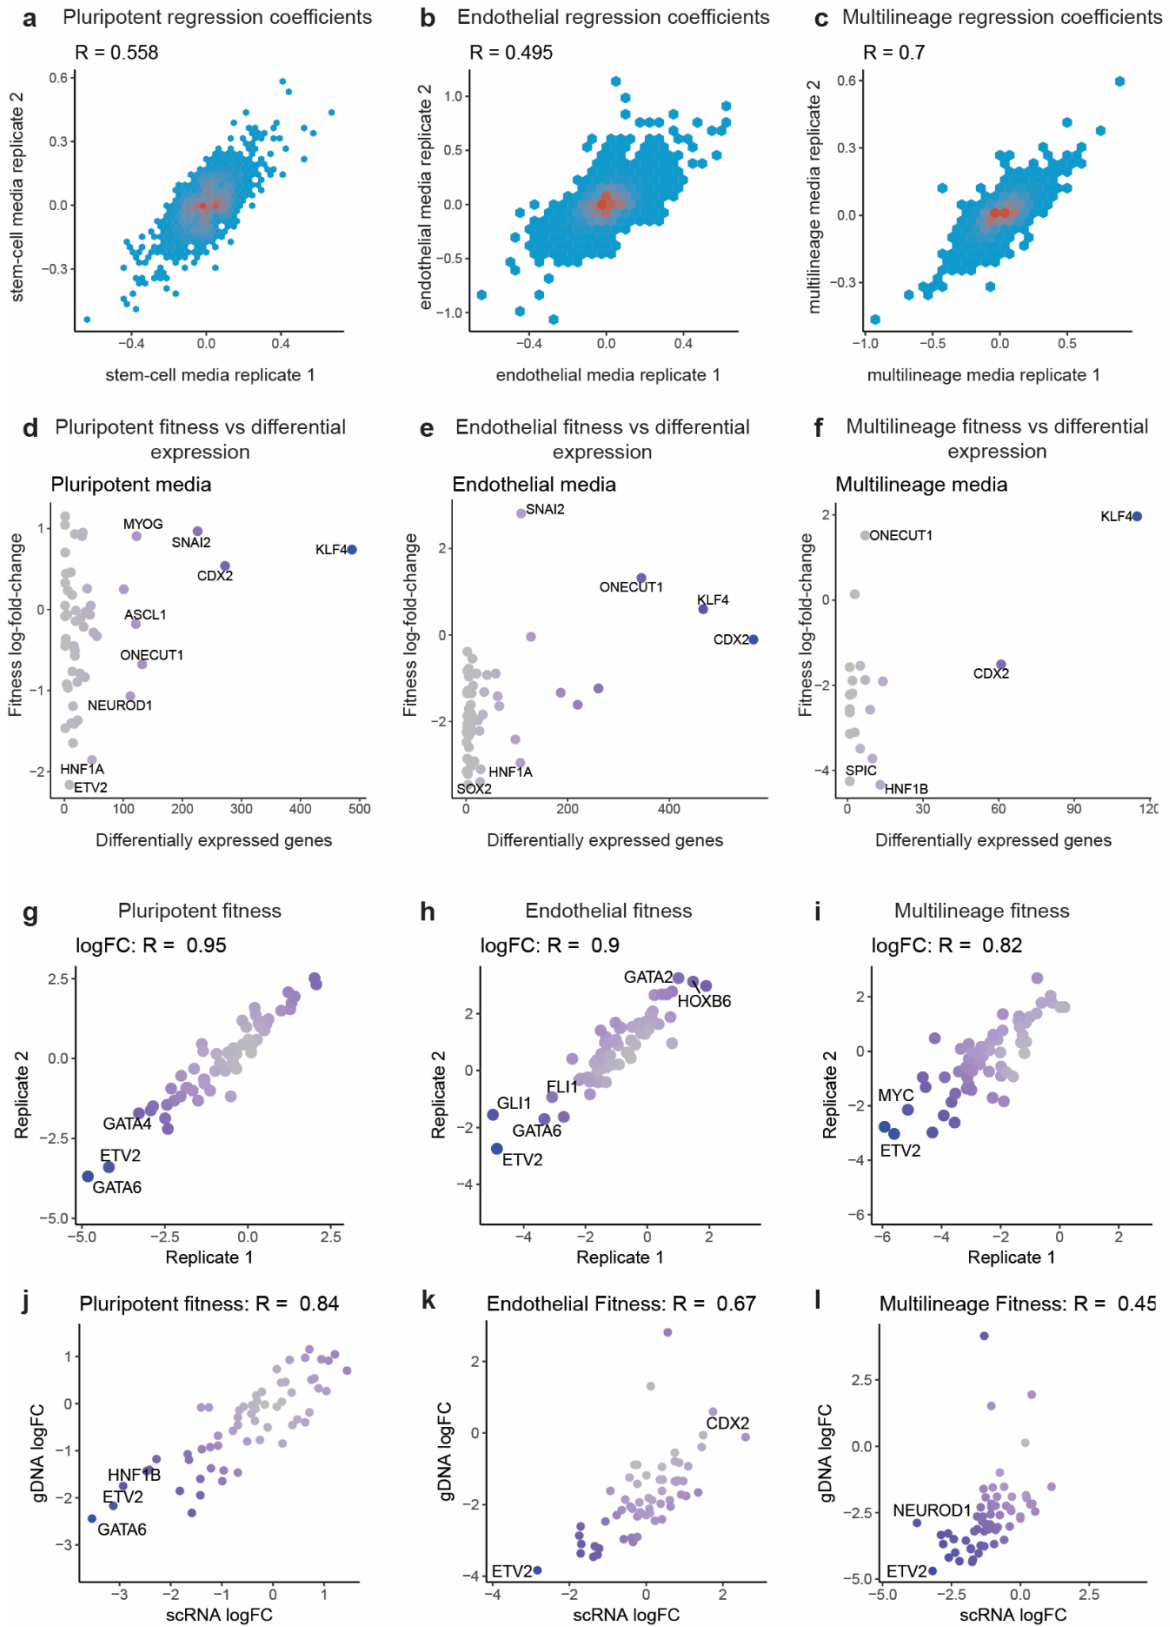

**Figure S2: Correlation of scRNA-seq data between replicates, correlation between transcriptomic and fitness effects, correlation of fitness estimates from scRNA-seq genotyped cell counts between replicates, and correlation of fitness estimates from scRNA-seq genotyped cell counts vs bulk fitness from genomic DNA. Related to Figure 1 and STAR Methods sections “Replicate Correlation” and “Fitness Effects Analysis”.** (a) Correlation between coefficients in the pluripotent medium screens. (b) Correlation between coefficients in the unilineage medium screens. (c) Correlation between coefficients in the multilineage medium screens. For (a)-(c), correlation was between regression coefficients, with each coefficient representing the effect of a TF on an individual gene. We subset to coefficients that are nonzero with an adjusted p-value (FDR) of less than 0.5 in *either* replicate to filter out coefficients that are zero in both replicates. (d)-(f) Correlation of the number of differentially expressed genes for each TF vs the fitness effect (log-FC) for: (d) Pluripotent medium. (e) Unilineage medium (EGM). (f) Multilineage medium. (g)-(i) Correlation between replicates of fitness estimates from scRNA-seq genotyped cell counts for: (g) Pluripotent medium. (h) Unilineage medium (EGM). (i) Multilineage medium. (j)-(l) Correlation between log fold change of TF counts vs plasmid library control for genomic DNA reads vs cell counts fitness for: (j) Pluripotent medium (k) Unilineage medium (EGM) (l) Multilineage medium

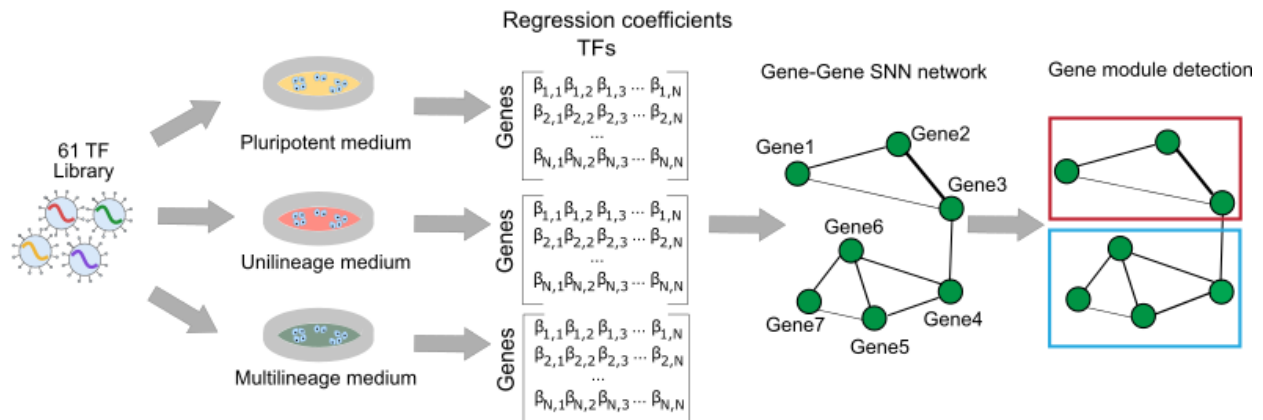

**Figure S3: Schematic for gene-gene co-perturbation network analysis, related to Figure 1 and STAR Methods section “Gene Co-perturbation Network and Module Detection”.** A SNN network is built from the linear model coefficients and the network is then segmented into gene modules. Genes have a highly weighted edge between them if they respond similarly to TF overexpression.

**a Pluripotent medium TF overlay**

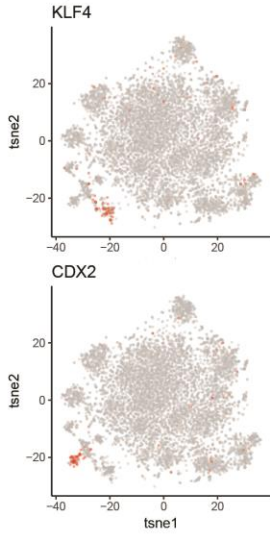

**b Endothelial medium TF overlay**

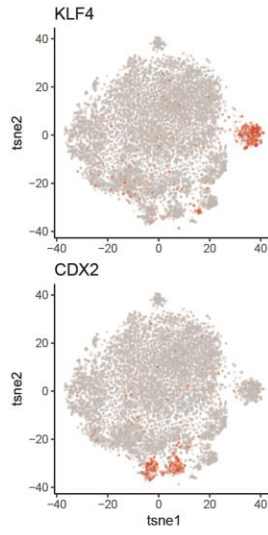

**c Multilineage medium TF overlay**

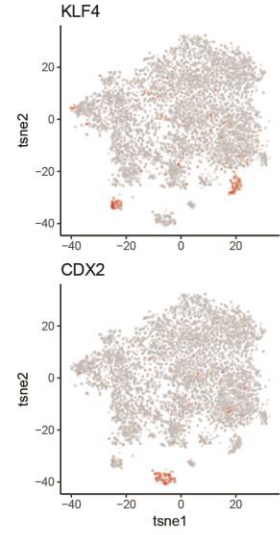

**d Pluripotent medium key gene expression**

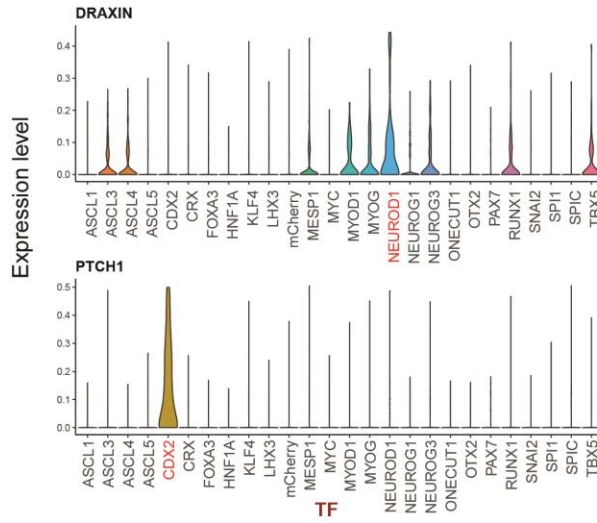

**e Endothelial medium key gene expression**

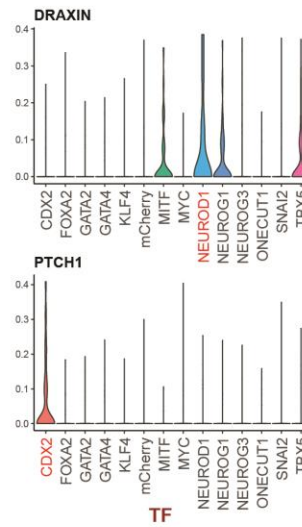

**f Multilineage medium key gene expression**

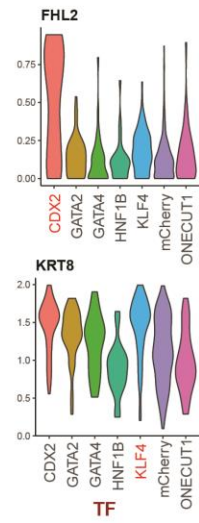

**g Geneset enrichment analysis (GSEA) of scRNA-seq effects**

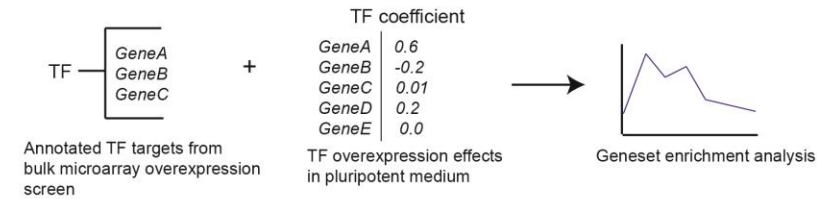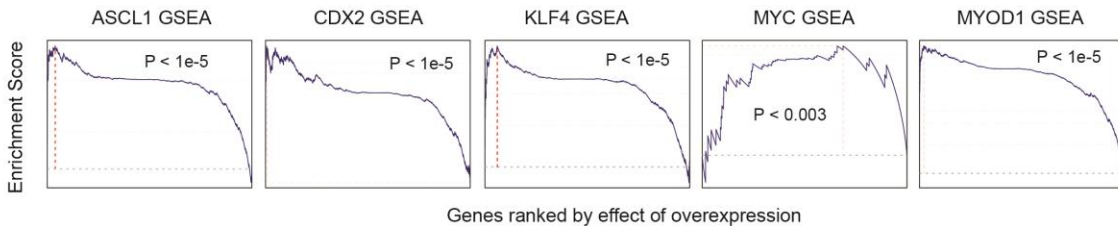

**Figure S4: Analysis and validation of significant TFs. Related to Figure 1 and STAR Methods section “Replicate Correlation”.** (a) tSNE plot of screens in pluripotent medium, color coded by select TFs (*KLF4*, *CDX2*) (b) tSNE plot of screens in unilineage medium, color coded by select TFs (*KLF4*, *CDX2*) (c) tSNE plot of screens in multilineage medium, color coded by select TFs (*KLF4*, *CDX2*) (d) Expression level of *DRAXIN* and *PTCH1* in screens in pluripotent medium with the TFs expected to upregulate expression of each highlighted in red (e) Expression level of *DRAXIN* and *PTCH1* in screens in unilineage medium with the TFs expected to upregulate expression of each highlighted in red (f) Expression level of *FHL2* and *KRT8* in screens in unilineage medium with the TFs expected to upregulate expression of each highlighted in red. (g) Geneset enrichment analysis for homologous genes in mESCs upon overexpression of TFs<sup>1</sup>. TFs present in both datasets – *ASCL1*, *CDX2*, *MYC*, *KLF4* and *MYOD1* – display a highly significant degree of overlap in their effects.



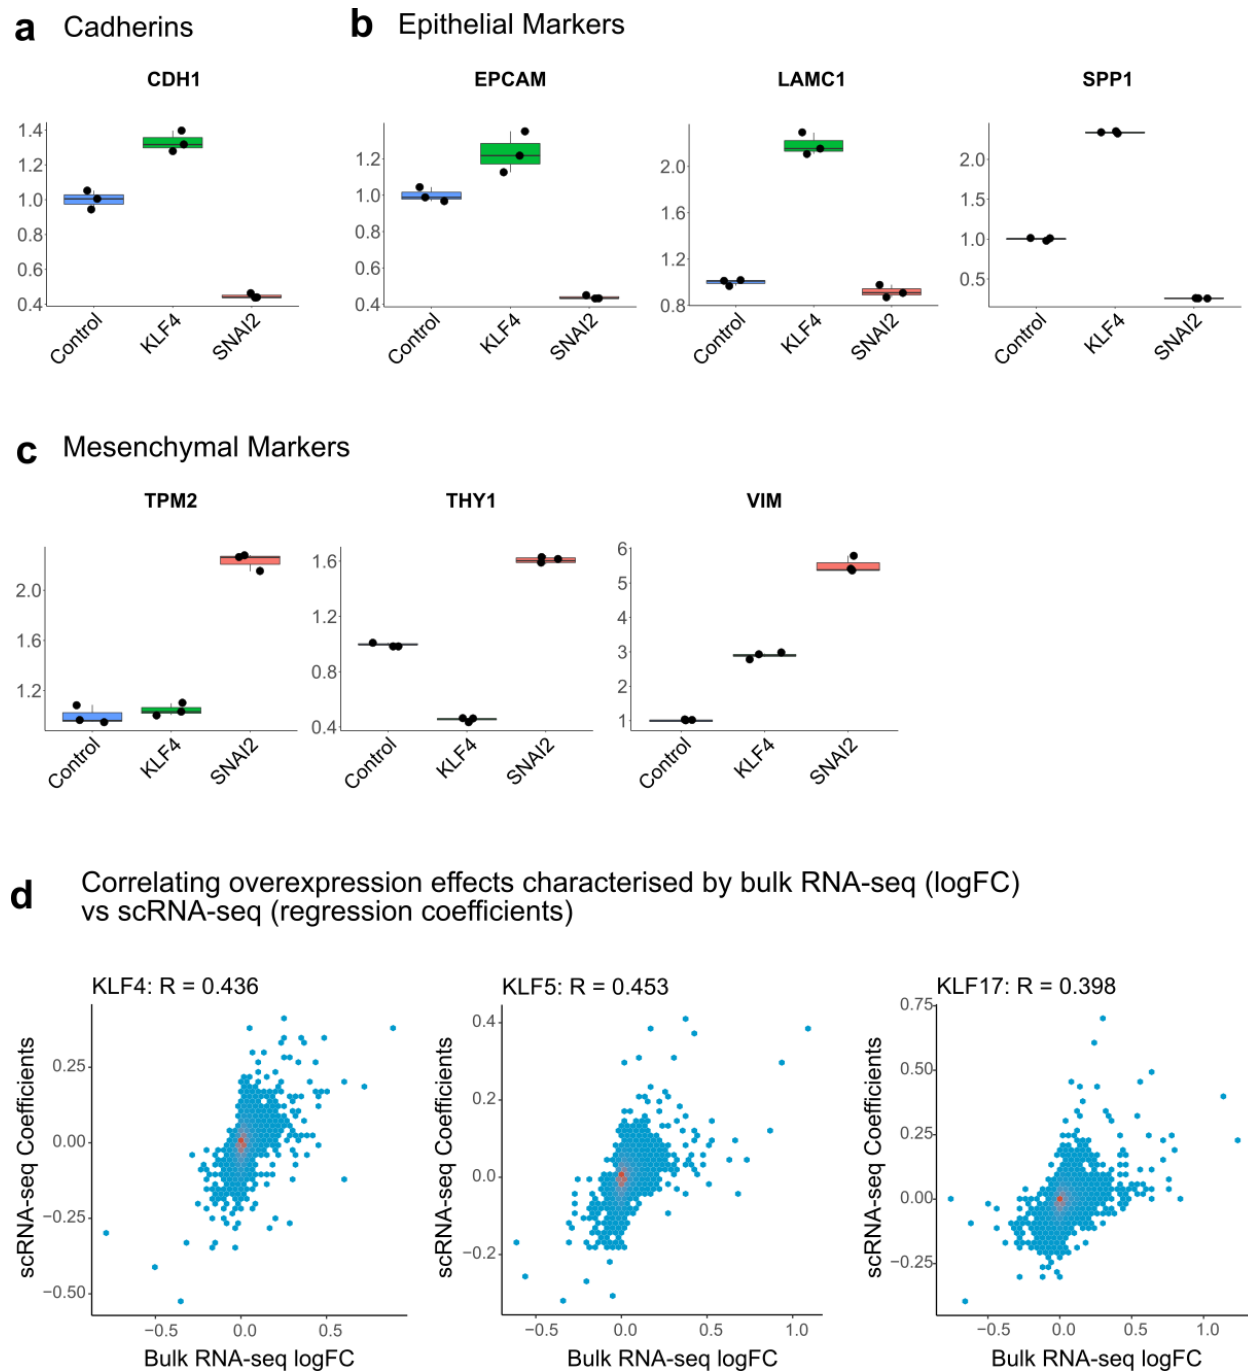

**Figure S5: Confirmatory assays for effects of *KLF4* and *SNAI2* on key genes involved in EMT. Related to Figure 2 and STAR Methods section “Bulk RNA-seq Analysis and Correlation”.** (a) qRT-PCR analysis of signature cadherin during EMT: *CDH1* at day 5 post-transduction in pluripotent stem cell medium. (b) qRT-PCR analysis of signature epithelial marker genes during EMT: *EPCAM*, *LAMC1* and *SPP1* at day 5 post-transduction in pluripotent stem cell medium. (c) qRT-PCR analysis of signature

mesenchymal marker genes during EMT: *TPM2*, *THY1* and *VIM* at day 5 post-transduction in pluripotent stem cell medium. Data for all assays were normalized to *GAPDH* and expressed relative to control cells. **(d)** Correlation of scRNA-seq regression coefficients versus log fold change in bulk RNA-seq for *KLF4*, *KLF5* and *KLF17*. Log fold change was calculated from bulk RNA-seq data for cells transduced with a TF versus cells transduced with control mCherry virus.

| Gene                 | Forward Primer (5' -> 3')        | Reverse Primer (5' -> 3')       |
|----------------------|----------------------------------|---------------------------------|
| CDH5                 | AGACCACGCCTCTGTCATGT<br>ACCAAATC | CACGATCTCATACCTGGCC<br>TGCTTC   |
| PECAM1               | GGTCAGCAGCATCGTGGTCA<br>ACATAAC  | TGGAGCAGGACAGGTTTCAG<br>TCTTTCA |
| VWF                  | TCTCCGTGGTCCTGAAGCAG<br>ACATA    | AGGTTGCTGCTGGTGAGGT<br>CATT     |
| KDR                  | AGCCATGTGGTCTCTCTGGTT<br>GTGTATG | GTTTGAGTGGTGCCGTACT<br>GGTAGGA  |
| NANOG                | TTTGTGGGCCTGAAGAAACT             | AGGGCTGTCCTGAATAAGC<br>AG       |
| POU5F1               | CTTGAATCCCGAATGGAAAG<br>GG       | GTGTATATCCCAGGGTGAT<br>CCTC     |
| SOX2                 | TACAGCATGTCCTACTCGCA<br>G        | GAGGAAGAGGTAACACAG<br>GG        |
| DNMT3B               | GAGTCCATTGCTGTTGGAAC<br>CG       | ATGTCCCTCTTGTCGCCAA<br>CCT      |
| SALL2                | CAGCGGAAACCCCAACAGTT<br>A        | GAGGGTCAGTAGAACATGC<br>GT       |
| DPPA4                | GACCTCCACAGAGAAGTCGA<br>G        | TGCCTTTTTCTTAGGGCAGA<br>G       |
| VIM                  | AGTCCACTGAGTACCGGAGA<br>C        | CATTCACGCATCTGGCGT<br>TC        |
| CDH1                 | CGAGAGCTACACGTTACACGG            | GGGTGTCGAGGGAAAAATA<br>GG       |
| CDH2                 | AGCCAACCTTAACTGAGGAG<br>T        | GGCAAGTTGATTGGAGGGA<br>TG       |
| EPCAM                | TGATCCTGACTGCGATGAGA<br>G        | CTTGTCTGTTCTTCTGACCC<br>C       |
| LAMC1                | GGCAACGTGGCCTTTTCTAC             | AGTGGCAGTTACCCATTCC<br>TG       |
| SPP1                 | GAAGTTTCGCAGACCTGACA<br>T        | GTATGCACCATTCAACTCCT<br>CG      |
| THY1                 | ATCGCTCTCCTGCTAACAGTC            | CTCGTACTGGATGGGTGAA<br>CT       |
| TPM2                 | CTGAGACCCGAGCAGAGTTT<br>G        | TGAATCTCGACGTTCTCCTC<br>C       |
| TF<br>Overexpression | TTAGCCAGACGAGCGGGTTC             | GTCGTCCATCACAGTTTGC<br>CAG      |

**Table S5:** qRT-PCR primers, Related to Figure 2, Figure S1, Figure S5, STAR Methods
